# Supplementary material for: Proteomic Characterization of Collagen-Based Animal Glues for Restoration
Source: PubMed Central journal article supplement (PMC9442796; doi:10.1021/acs.jproteome.2c00232), 2022-08-15
Supplement: pr2c00232_si_001.pdf [file pr2c00232_si_001.pdf]

## Supplementary materials

### Proteomic characterization of collagen-based animal glues for restoration.

Georgia Ntasi<sup>1</sup>, Sara Sbriglia<sup>1</sup>, Rossana Pitocchi<sup>1</sup>, Roberto Vinciguerra<sup>1</sup>, Chiara Melchiorre<sup>1</sup>, Laura Dello Iorio<sup>2</sup>, Giancarlo Fatigati<sup>3</sup>, Emanuele Crisci<sup>4</sup>, Ilaria Bonaduce<sup>4</sup>, Andrea Carpentieri<sup>1,3,5</sup>, Gennaro Marino<sup>1,3</sup> and Leila Birolo<sup>1,5\*</sup>.

<sup>1</sup> Department of Chemical Sciences, University of Naples Federico II, Complesso Universitario di Monte S. Angelo, Via Cinthia 21, 80126 Naples, Italy

<sup>2</sup> Dello Iorio Restauri, 80069 Vico Equense, Naples, Italy

<sup>3</sup> Department of Humanities, University Suor Orsola Benincasa, via Santa Caterina da Siena 37, 80132, Naples, Italy

<sup>4</sup> Department of Chemistry and Industrial Chemistry, via Risorgimento 35, University of Pisa, 56126 Pisa, Italy

<sup>5</sup> Task Force "Metodologie Analitiche per la Salvaguardia dei Beni Culturali", University of Naples Federico II, 80138 Naples, Italy

\*Correspondence to:

Leila Birolo, Department of Chemical Sciences, University of Naples Federico II, Complesso Universitario di Monte S. Angelo, Via Cinthia 21, 80126 Naples, Italy. Phone: +39-081-679939. E-mail: [birolo@unina.it](mailto:birolo@unina.it).

### Table of contents

|                                                                                                        |   |
|--------------------------------------------------------------------------------------------------------|---|
| Table of contents.....                                                                                 | 1 |
| <i>Materials and methods</i> .....                                                                     | 3 |
| Animal glue samples.....                                                                               | 3 |
| Table S1: Animal glue's information, provenience, and classification upon proteomic analysis results.. | 3 |
| <i>Results</i> .....                                                                                   | 6 |
| Table S2 Relative content of amino acids obtained by GC-MS.....                                        | 6 |
| Proteomic identification.....                                                                          | 7 |
| Table S3: Collagen chains identified in the Rabbit Glue SOB1 sample (HP1).....                         | 7 |
| Table S4: Collagen chains identified in the Rabbit Glue SOB5 sample. (HM1).....                        | 7 |
| Table S5: Collagen chains identified in the Rabbit Glue SOB2 sample. (HP2).....                        | 7 |
| Table S6: Collagen chains identified in the Rabbit Glue SOB3 sample. (HP3).....                        | 7 |
| Table S7: Collagen chains identified in the Rabbit Glue SOB4 sample (HP4).....                         | 7 |
| Table S8: Collagen chains identified in the Strong glue SOB8 sample (BM1). .....                       | 8 |
| Table S9: Proteins identified in the Strong glue SOB9 sample (BM2).....                                | 8 |

|                                                                                                                                                                                                             |    |
|-------------------------------------------------------------------------------------------------------------------------------------------------------------------------------------------------------------|----|
| Table S10: Collagen chains identified in the Fish Glue SOB6 sample (HP5).....                                                                                                                               | 8  |
| Table S11: Collagen chains identified in the Sturgeon fish glue SOB7 sample. (FM).....                                                                                                                      | 8  |
| Table S12: Collagen chains identified in the Strong Glue 1 sample. (BM3) .....                                                                                                                              | 9  |
| Table S13: Collagen chains identified in the Rabbit Glue 2 sample. (HM2) .....                                                                                                                              | 9  |
| Table S14: Collagen chains identified in the Rabbit glue 3 sample (HM3).....                                                                                                                                | 9  |
| Table S15: Collagen chains identified in the Fish glue 4 sample (HP6). .....                                                                                                                                | 9  |
| Table S16: Collagen chains identified in the Fish glue 5 sample (HP7). .....                                                                                                                                | 10 |
| Table S17: Collagen chains identified in the Rabbit glue 6 sample (HM4).....                                                                                                                                | 10 |
| Table S18: Collagen chains identified in the Rabbit glue 7 sample (HM5).....                                                                                                                                | 10 |
| Table S19: Collagen chains identified in the Strong Glue 8 sample (BM4). .....                                                                                                                              | 10 |
| Table S20: Collagen chains identified in the Strong Glue 9 sample (BM5). .....                                                                                                                              | 11 |
| Table S21: Collagen chains identified in the Rabbit Glue 10 sample (HP8).....                                                                                                                               | 11 |
| Collagen modification: Backbone cleavage .....                                                                                                                                                              | 12 |
| Figure S1. HP6 glue pyrogram. Peak numbering refers to compounds listed in Table S22 .....                                                                                                                  | 12 |
| Table S22 Molecules identified in the pyrogram of HP6 and their most abundant mass spectrometric ions ( <i>m/z</i> ).....                                                                                   | 12 |
| Figure S2. Sum of the areas of all DKPs detected normalized for the sample weight .....                                                                                                                     | 13 |
| Collagen damage: deamidation of glutamine and asparagine.....                                                                                                                                               | 14 |
| Figure S3: Overall percentage of deamidation of the single collagen chains in bovine pure hide glues (HP).....                                                                                              | 14 |
| Figure S4: Overall percentage of deamidation of the single collagen chains in pure hide glues that contain only porcine glue (HP5) (A panel) and only rabbit glue (HP1) (B panel). .....                    | 15 |
| Figure S5: Overall percentage of deamidation of bovine collagen alpha-1(I) (A), collagen alpha-2(I) (B), and collagen alpha-1(III) (C) chains in mixed hide and bone glues containing bovine collagen. .... | 15 |
| Figure S6: Overall percentage of deamidation of the protein family collagen alpha-1(I) in mixed animal glues.....                                                                                           | 16 |
| Figure S7: Overall percentage of deamidation of the protein family collagen alpha-2(I) in mixed animal glues.....                                                                                           | 16 |
| Figure S8: Overall percentage of deamidation of the protein family collagen alpha-1(III) in mixed animal glues.....                                                                                         | 17 |
| Table S23: Site-specific evaluation of deamidation (N, Q) and oxidation (M) along <i>Bos taurus</i> collagen $\alpha$ 1(I) sequence in all the pure bovine animal glues.....                                | 18 |
| Table S24: Site-specific evaluation of deamidation (N, Q) and oxidation (M) along <i>Bos taurus</i> collagen $\alpha$ 2(I) sequence in all the pure bovine animal glues.....                                | 19 |
| Table S25. Accession entries as in the COLLE database and their correspondence in Uniprot database ..                                                                                                       | 21 |
| <i>References</i> .....                                                                                                                                                                                     | 22 |

## Materials and methods

### Animal glue samples.

Table S1: Animal glue's information, provenience, and classification upon proteomic analysis results

| <b>Animal glue Name</b>                                                                                 | <b>Age</b>            | <b>Source</b>            | <b>Hide Pure (HP)<br/>Hide Mixed (HM)<br/>Bone Mixed (BM)<br/>Fish Mixed (FM)</b> |
|---------------------------------------------------------------------------------------------------------|-----------------------|--------------------------|-----------------------------------------------------------------------------------|
| Rabbit glue SOB1<br>   | After first World war | Suor Orsola Benincasa    | <b>HP1</b>                                                                        |
| Rabbit Glue SOB2<br>  | 1960s                 | Suor Orsola Benincasa    | <b>HP2</b>                                                                        |
| Rabbit glue SOB3<br> | 1960s                 | Suor Orsola Benincasa    | <b>HP3</b>                                                                        |
| Rabbit glue SOB4<br> | 1960s                 | Suor Orsola Benincasa    | <b>HP4</b>                                                                        |
| Rabbit glue SOB5<br> | 1960s                 | Suor Orsola Benincasa    | <b>HM1</b>                                                                        |
| Rabbit glue 10<br>   | Modern                | Museo Nacional del Prado | <b>HP8</b>                                                                        |

|                                                                                                                    |        |                          |            |
|--------------------------------------------------------------------------------------------------------------------|--------|--------------------------|------------|
| <p>Rabbit glue 3</p>              | Modern | Museo Nacional del Prado | <b>HM3</b> |
| <p>Rabbit glue 7</p>              | Modern | Museo Nacional del Prado | <b>HM5</b> |
| <p>Rabbit glue 6</p>              | Modern | Museo Nacional del Prado | <b>HM4</b> |
| <p>Fish glue SOB6</p>            | 1960s  | Suor Orsola Benincasa    | <b>HP5</b> |
| <p>Fish glue 4</p>              | Modern | Museo Nacional del Prado | <b>HP6</b> |
| <p>Fish glue 5</p>              | Modern | Museo Nacional del Prado | <b>HP7</b> |
| <p>Sturgeon fish glue SOB7</p>  | 1960s  | Suor Orsola Benincasa    | <b>FM</b>  |
| <p>Strong glue SOB8</p>         | 1960s  | Suor Orsola Benincasa    | <b>BM1</b> |

|                                                                                                           |        |                          |            |
|-----------------------------------------------------------------------------------------------------------|--------|--------------------------|------------|
| <p>Strong glue SOB9</p>  | 1960s  | Suor Orsola Benincasa    | <b>BM2</b> |
| <p>Strong glue 8</p>     | Modern | Museo Nacional del Prado | <b>BM4</b> |
| <p>Strong glue 9</p>     | Modern | Museo Nacional del Prado | <b>BM5</b> |
| <p>Strong glue 1</p>    | Modern | Museo Nacional del Prado | <b>BM3</b> |
| <p>Rabbit glue 2</p>   | Modern | Museo Nacional del Prado | <b>HM2</b> |

## Results

Table S2 Relative content of amino acids obtained by GC-MS

| Sample |         | Ala  | Gly  | Val | Leu | Ile | Met | Ser | Pro  | Phe | Asp  | Glu  | Hyp  | Tyr  |
|--------|---------|------|------|-----|-----|-----|-----|-----|------|-----|------|------|------|------|
| HM2    | average | 9.9  | 24.9 | 2.8 | 3.8 | 1.7 | 0.8 | 4.8 | 14.8 | 2.6 | 10.4 | 12.6 | 7.1  | 3.7  |
|        | SD      | 0.4  | 1.0  | 0.2 | 0.2 | 0.1 | 0.2 | 0.7 | 0.1  | 0.2 | 0.6  | 4.2  | 1.4  | 3.4  |
| HP4    | average | 10.9 | 29.2 | 2.6 | 3.4 | 1.6 | 0.7 | 3.9 | 18.4 | 1.7 | 7.3  | 8.7  | 11.1 | 0.4  |
|        | SD      | 0.2  | 1.9  | 0.2 | 0.3 | 0.1 | 0.2 | 0.3 | 0.8  | 0.1 | 0.9  | 0.3  | 0.4  | 0.1  |
| BM2    | average | 10.4 | 28.7 | 2.7 | 3.4 | 1.5 | 0.5 | 4.8 | 14.7 | 2.4 | 8.1  | 12.1 | 10.0 | 0.6  |
|        | SD      | 1.4  | 0.1  | 0.3 | 0.4 | 0.2 | 0.1 | 1.5 | 0.2  | 0.3 | 0.7  | 0.9  | 3.8  | 0.3  |
| BM1    | average | 9.6  | 26.8 | 2.5 | 3.0 | 1.3 | 0.4 | 3.8 | 16.2 | 2.2 | 7.7  | 12.4 | 13.3 | 0.7  |
|        | SD      | 0.3  | 4.9  | 0.0 | 0.1 | 0.0 | 0.1 | 0.9 | 2.4  | 0.6 | 3.1  | 4.5  | 1.9  | 0.4  |
| HP8    | average | 9.3  | 25.2 | 2.5 | 3.0 | 1.4 | 0.5 | 4.9 | 15.2 | 1.8 | 7.3  | 10.5 | 17.8 | 0.5  |
|        | SD      | 0.5  | 0.0  | 0.2 | 0.1 | 0.1 | 0.1 | 0.0 | 0.8  | 0.0 | 0.6  | 0.9  | 0.6  | 0.3  |
| HP1    | average | 9.1  | 26.8 | 2.5 | 3.0 | 1.4 | 0.4 | 4.5 | 15.9 | 1.8 | 7.1  | 10.9 | 16.3 | 0.5  |
|        | SD      | 2.0  | 6.7  | 0.6 | 0.7 | 0.3 | 0.0 | 1.1 | 2.4  | 0.1 | 0.3  | 0.3  | 11.5 | 0.2  |
| BM5    | average | 10.1 | 25.5 | 2.8 | 3.6 | 1.6 | 0.6 | 4.6 | 13.7 | 2.5 | 8.1  | 12.8 | 12.8 | 1.4  |
|        | SD      | 0.2  | 0.5  | 0.3 | 0.2 | 0.1 | 0.2 | 0.1 | 2.3  | 0.0 | 0.3  | 1.4  | 1.3  | 0.0  |
| BM3    | average | 9.8  | 25.0 | 2.7 | 3.5 | 1.5 | 0.6 | 4.0 | 15.2 | 2.3 | 7.8  | 11.7 | 15.0 | 0.8  |
|        | SD      | 0.6  | 1.5  | 0.3 | 0.3 | 0.1 | 0.1 | 0.2 | 0.3  | 0.0 | 0.2  | 0.6  | 2.5  | 0.1  |
| HM3    | average | 9.6  | 24.8 | 2.7 | 3.3 | 1.6 | 0.5 | 5.4 | 15.4 | 2.2 | 8.8  | 12.2 | 12.7 | 0.7  |
|        | SD      | 0.6  | 2.1  | 0.2 | 0.1 | 0.1 | 0.0 | 0.8 | 0.8  | 0.1 | 0.4  | 0.6  | 2.4  | 0.1  |
| HM1    | average | 10.4 | 29.4 | 2.4 | 2.9 | 1.5 | 0.3 | 3.8 | 17.3 | 1.9 | 7.3  | 11.5 | 11.0 | 0.3  |
|        | SD      | 0.6  | 0.7  | 0.1 | 0.0 | 0.0 | 0.1 | 0.9 | 3.0  | 0.5 | 2.7  | 4.4  | 4.1  | 0.1  |
| BM4    | average | 10.8 | 24.8 | 2.9 | 3.4 | 1.6 | 0.6 | 5.6 | 15.8 | 2.0 | 6.4  | 9.4  | 15.8 | 0.9  |
|        | SD      | 1.4  | 2.9  | 0.6 | 0.8 | 0.3 | 0.2 | 2.5 | 1.9  | 0.1 | 0.5  | 0.1  | 6.5  | 0.6  |
| FM     | average | 11.1 | 31.6 | 2.8 | 3.3 | 2.7 | 1.2 | 4.1 | 15.8 | 1.9 | 5.9  | 9.5  | 9.8  | 11.1 |
|        | SD      | 0.1  | 3.0  | 0.1 | 0.1 | 0.1 | 0.5 | 0.3 | 0.2  | 0.0 | 0.3  | 0.3  | 3.1  | 0.1  |
| HP3    | average | 9.0  | 26.3 | 2.3 | 3.0 | 1.4 | 0.2 | 4.7 | 17.2 | 1.8 | 7.5  | 11.9 | 14.5 | 0.3  |
|        | SD      | 0.3  | 0.1  | 0.3 | 0.5 | 0.2 | 0.2 | 0.5 | 1.7  | 0.1 | 0.2  | 1.4  | 0.5  | 0.1  |
| HP7    | average | 9.7  | 27.8 | 2.3 | 2.9 | 1.5 | 0.5 | 4.2 | 15.7 | 2.1 | 7.9  | 12.6 | 12.3 | 0.5  |
|        | SD      | 0.1  | 2.6  | 0.0 | 0.1 | 0.0 | 0.1 | 0.4 | 2.5  | 0.4 | 2.2  | 3.4  | 1.8  | 0.5  |
| HP2    | average | 9.8  | 28.8 | 1.8 | 3.0 | 1.0 | 0.9 | 4.8 | 17.6 | 1.8 | 6.6  | 9.2  | 14.2 | 0.4  |
|        | SD      | 0.5  | 4.9  | 0.1 | 0.1 | 0.0 | 0.0 | 0.9 | 2.3  | 0.2 | 2.3  | 2.5  | 1.8  | 0.1  |
| HM4    | average | 10.1 | 29.5 | 1.7 | 3.1 | 1.2 | 0.7 | 4.4 | 16.6 | 2.0 | 7.8  | 11.0 | 11.4 | 0.5  |
|        | SD      | 0.7  | 6.8  | 0.2 | 0.5 | 0.1 | 0.0 | 0.6 | 2.1  | 0.3 | 2.1  | 3.2  | 3.8  | 0.3  |
| HP6    | average | 9.3  | 28.6 | 1.4 | 2.6 | 1.1 | 0.7 | 6.4 | 15.8 | 2.0 | 7.8  | 12.8 | 11.1 | 0.4  |
|        | SD      | 0.9  | 0.4  | 0.2 | 0.4 | 0.2 | 0.0 | 0.3 | 1.7  | 0.1 | 0.4  | 0.2  | 0.9  | 0.1  |
| HP5    | average | 9.4  | 28.7 | 1.5 | 2.7 | 0.8 | 0.9 | 5.0 | 14.7 | 2.4 | 7.9  | 13.6 | 11.4 | 0.9  |
|        | SD      | 0.1  | 2.3  | 0.0 | 0.0 | 0.0 | 0.0 | 0.0 | 2.7  | 0.2 | 0.5  | 0.3  | 1.3  | 0.0  |
| HM5    | average | 7.9  | 29.3 | 2.3 | 2.8 | 1.3 | 0.6 | 8.6 | 18.0 | 1.7 | 6.8  | 10.4 | 10.1 | 0.2  |
|        | SD      | 1.5  | 5.3  | 0.3 | 0.1 | 0.0 | 0.2 | 2.6 | 0.8  | 0.5 | 1.2  | 3.4  | 0.0  | 0.1  |

## Proteomic identification

MS/MS raw data were routinely searched by Mascot MS/MS Ion search software using COLLE database and considering deamidation on Gln and Asn, oxidation on Met, hydroxylation of proline and lysine as variable modifications, unless otherwise stated. LC-MS/MS data and COLLE database have been deposited to Mendeley Data <https://data.mendeley.com/datasets/hbmc8yhf7y/4>

Table S3: Collagen chains identified in the Rabbit Glue SOB1 sample (HP1)

| Gene Name | Taxonomy                     | Protein Identifier | Protein Score | Sequence Coverage (%) | No. of Peptides | No. of Unique Peptides |
|-----------|------------------------------|--------------------|---------------|-----------------------|-----------------|------------------------|
| COL1A1    | <i>Oryctolagus cuniculus</i> | G1T4A5             | 2887          | 57                    | 47              | 6                      |
| COL1A2    | <i>Oryctolagus cuniculus</i> | G1T2Z5             | 2847          | 55                    | 47              | 17                     |
| COL3A1    | <i>Oryctolagus cuniculus</i> | G1T8J0             | 1689          | 33                    | 32              | 15                     |

Table S4: Collagen chains identified in the Rabbit Glue SOB5 sample. (HM1)

| Gene name | Taxonomy          | Protein identifier | Protein Score | Sequence coverage (%) | No. of Peptides | No. of Unique Peptides |
|-----------|-------------------|--------------------|---------------|-----------------------|-----------------|------------------------|
| COL1A1    | <i>Bos taurus</i> | P02453             | 2698          | 48                    | 48              | 2                      |
| COL1A1    | <i>Sus scrofa</i> | AOA287A1S6         | 2492          | 48                    | 12              | 5                      |
| COL1A2    | <i>Sus scrofa</i> | AOA1S7J1Y9         | 2140          | 45                    | 36              | 12                     |
| COL1A2    | <i>Bos taurus</i> | P02465             | 1802          | 39                    | 18              | 7                      |
| COL3A1    | <i>Bos taurus</i> | P04258             | 1119          | 28                    | 22              | 7                      |
| COL3A1    | <i>Sus scrofa</i> | F1RYI8             | 865           | 23                    | 6               | 4                      |

Table S5: Collagen chains identified in the Rabbit Glue SOB2 sample. (HP2)

| Gene name | Taxonomy          | Protein identifier | Protein Score | Sequence coverage (%) | No. of peptides | No. of Unique Peptides |
|-----------|-------------------|--------------------|---------------|-----------------------|-----------------|------------------------|
| COL1A1    | <i>Bos taurus</i> | P02453             | 2704          | 53                    | 47              | 1                      |
| COL1A2    | <i>Bos taurus</i> | P02465             | 2568          | 54                    | 42              | 7                      |
| COL3A1    | <i>Bos taurus</i> | P04258             | 1669          | 34                    | 27              | 10                     |

Table S6: Collagen chains identified in the Rabbit Glue SOB3 sample. (HP3)

| Gene Name | Taxonomy          | Protein Identifier | Protein Score | Sequence Coverage (%) | No. of Peptides | No. of Unique Peptides |
|-----------|-------------------|--------------------|---------------|-----------------------|-----------------|------------------------|
| COL1A1    | <i>Bos taurus</i> | P02453             | 2345          | 44                    | 43              | 1                      |
| COL1A2    | <i>Bos taurus</i> | P02465             | 1781          | 36                    | 29              | 6                      |
| COL3A1    | <i>Bos taurus</i> | P04258             | 622           | 16                    | 13              | 10                     |

Table S7: Collagen chains identified in the Rabbit Glue SOB4 sample (HP4).

| Gene name | Taxonomy | Protein identifier | Protein Score | Sequence coverage (%) | No. of Peptides | No. of Unique Peptides |
|-----------|----------|--------------------|---------------|-----------------------|-----------------|------------------------|
|-----------|----------|--------------------|---------------|-----------------------|-----------------|------------------------|

|        |                   |        |      |    |    |   |
|--------|-------------------|--------|------|----|----|---|
| COL1A1 | <i>Bos taurus</i> | P02453 | 2497 | 48 | 47 | 2 |
| COL1A2 | <i>Bos taurus</i> | P02465 | 1647 | 35 | 30 | 4 |
| COL3A1 | <i>Bos taurus</i> | P04258 | 925  | 28 | 22 | 6 |

Table S8: Collagen chains identified in the Strong glue SOB8 sample (BM1).

| Gene name | Taxonomy          | Protein identifier | Protein Score | Sequence coverage (%) | No. of Peptides | No. of Unique Peptides |
|-----------|-------------------|--------------------|---------------|-----------------------|-----------------|------------------------|
| COL1A2    | <i>Bos taurus</i> | P02465             | 2555          | 51                    | 44              | 9                      |
| COL1A1    | <i>Bos taurus</i> | P02453             | 2507          | 44                    | 41              | 1                      |
| COL1A1    | <i>Sus scrofa</i> | A0A287A1S6         | 2367          | 42                    | 16              | 5                      |
| COL1A2    | <i>Sus scrofa</i> | A0A1S7J1Y9         | 2292          | 43                    | 11              | 9                      |

Table S9: Proteins identified in the Strong glue SOB9 sample (BM2)

MS/MS raw data were searched by Mascot MS/MS Ion search software using COLLE database and considering deamidation on Gln and Asn, oxidation on Met, hydroxylation of proline and lysine as variable modifications. <sup>a</sup>Bovine casein, highlighted in grey, was identified in a preliminary search against SwissProt database (561911 sequences; 202173710 residues) using Chordata as taxonomy (85899 sequences) and considering methionine oxidation and phosphorylation of serine and threonine as variable modifications.

| Gene name          | Taxonomy            | Protein identifier | ProteinScore | Sequence coverage (%) | No. of Peptides | No. of Unique Peptides |
|--------------------|---------------------|--------------------|--------------|-----------------------|-----------------|------------------------|
| COL1A2             | <i>Bos taurus</i>   | P02465             | 2660         | 55                    | 45              | 7                      |
| COL1A1             | <i>Bos taurus</i>   | P02453             | 932          | 45                    | 42              | 5                      |
| COL1A1             | <i>Sus scorfa</i>   | A0A287A1S6         | 2250         | 42                    | 7               | 4                      |
| COL1A2             | <i>Sus scorfa</i>   | A0A1S7J1Y9         | 2064         | 40                    | 14              | 8                      |
| COL1A1             | <i>Equus asinus</i> | B9VR88             | 2372         | 43                    | 4               | 3                      |
| COL1A2             | <i>Equus asinus</i> | B9VR89             | 2027         | 45                    | 12              | 8                      |
| CASA1 <sup>a</sup> | <i>Bos taurus</i>   | P02662             | 552          | 19                    | 3               | 3                      |

Table S10: Collagen chains identified in the Fish Glue SOB6 sample (HP5)

| Gene Name | Taxonomy          | Protein identifier | Protein Score | Sequence coverage (%) | No. of Peptides | No. of Unique Peptides |
|-----------|-------------------|--------------------|---------------|-----------------------|-----------------|------------------------|
| COL1A1    | <i>Sus scrofa</i> | A0A287A1S6         | 3107          | 54                    | 52              | 8                      |
| COL1A2    | <i>Sus scrofa</i> | A0A1S7J1Y9         | 3026          | 55                    | 47              | 19                     |
| COL3A1    | <i>Sus scrofa</i> | F1RYI8             | 1345          | 33                    | 29              | 15                     |

Table S11: Collagen chains identified in the Sturgeon fish glue SOB7 sample. (FM)

| Gene Name | Taxonomy                     | Protein Identifier | Protein Score | Sequence Coverage (%) | No. of Peptides | No. of Unique Peptides |
|-----------|------------------------------|--------------------|---------------|-----------------------|-----------------|------------------------|
| COL1A1    | <i>Scyliorhinus canicula</i> | D0PQF7             | 586           | 13                    | 11              | 8                      |
| COL1A1    | <i>Sus scrofa</i>            | A0A287A1S6         | 425           | 11                    | 6               | 3                      |
| COL1A2    | <i>Sus scrofa</i>            | A0A1S7J1Y9         | 205           | 8                     | 5               | 4                      |



Table S12: Collagen chains identified in the Strong Glue 1 sample. (BM3)

| Gene Name | Taxonomy            | Protein Identifier | Protein Score | Sequence Coverage (%) | No. of Peptides | No. of Unique Peptides |
|-----------|---------------------|--------------------|---------------|-----------------------|-----------------|------------------------|
| COL1A2    | <i>Bos taurus</i>   | P02465             | 2841          | 60                    | 58              | 8                      |
| COL1A1    | <i>Bos taurus</i>   | P02453             | 2735          | 60                    | 61              | 1                      |
| COL1A2    | <i>Sus scrofa</i>   | A0A1S7J1Y9         | 1917          | 47                    | 44              | 5                      |
| COL1A2    | <i>Equus asinus</i> | B9VR89             | 1656          | 43                    | 38              | 7                      |
| COL1A1    | <i>Equus asinus</i> | B9VR88             | 2263          | 51                    | 52              | 1                      |

Table S13: Collagen chains identified in the Rabbit Glue 2 sample. (HM2)

| Gene Name | Taxonomy                          | Protein Identifier    | Protein Score | Sequence Coverage (%) | No. of Peptides | No. of Unique Peptides |
|-----------|-----------------------------------|-----------------------|---------------|-----------------------|-----------------|------------------------|
| COL1A2    | <i>Ovis aries</i>                 | M4JBX7                | 2310          | 59                    | 52              | 5                      |
| COL1A1    | <i>Capra hircus or Ovis aries</i> | A0A452FHU9/<br>W5P481 | 2308          | 53                    | 53              | 0                      |
| COL1A1    | <i>Oryctolagus cuniculus</i>      | G1T4A5                | 2053          | 60                    | 49              | 4                      |
| COL3A1    | <i>Ovis aries</i>                 | W5Q4S0                | 1254          | 31                    | 32              | 7                      |
| COL1A2    | <i>Oryctolagus cuniculus</i>      | G1T2Z5                | 1240          | 41                    | 31              | 10                     |
| COL3A1    | <i>Oryctolagus cuniculus</i>      | G1T8J0                | 866           | 23                    | 22              | 7                      |

Table S14: Collagen chains identified in the Rabbit glue 3 sample (HM3).

| Gene Name | Taxonomy                          | Protein Identifier    | Protein Score | Sequence Coverage (%) | No. of Peptides | No. of Unique Peptides |
|-----------|-----------------------------------|-----------------------|---------------|-----------------------|-----------------|------------------------|
| COL1A2    | <i>Oryctolagus cuniculus</i>      | G1T2Z5                | 2508          | 59                    | 51              | 17                     |
| COL1A1    | <i>Capra hircus or Ovis aries</i> | A0A452FHU9/<br>W5P481 | 2386          | 56                    | 54              | 2                      |
| COL1A1    | <i>Bos taurus</i>                 | P02453                | 2297          | 54                    | 48              | 0                      |
| COL1A1    | <i>Oryctolagus cuniculus</i>      | G1T4A5                | 2231          | 65                    | 47              | 5                      |
| COL1A2    | <i>Bos taurus</i>                 | P02465                | 2131          | 53                    | 45              | 8                      |
| COL1A2    | <i>Ovis aries</i>                 | W5NTT7                | 1984          | 50                    | 42              | 3                      |
| COL3A1    | <i>Oryctolagus cuniculus</i>      | G1T8J0                | 1221          | 32                    | 98              | 7                      |
| COL3A1    | <i>Bos taurus</i>                 | P04258                | 1123          | 28                    | 26              | 3                      |

Table S15: Collagen chains identified in the Fish glue 4 sample (HP6).

| Gene Name | Taxonomy | Protein Identifier | Protein Score | Sequence Coverage (%) | No. of Peptides | No. of Unique Peptides |
|-----------|----------|--------------------|---------------|-----------------------|-----------------|------------------------|
|-----------|----------|--------------------|---------------|-----------------------|-----------------|------------------------|

|        |                   |        |      |    |    |   |
|--------|-------------------|--------|------|----|----|---|
| COL1A1 | <i>Bos taurus</i> | P02453 | 2393 | 53 | 58 | 2 |
| COL1A2 | <i>Bos taurus</i> | P02465 | 2537 | 59 | 57 | 6 |
| COL3A1 | <i>Bos taurus</i> | P04258 | 843  | 31 | 25 | 6 |

Table S16: Collagen chains identified in the Fish glue 5 sample (HP7).

| Gene Name | Taxonomy          | Protein Identifier | Protein Score | Sequence Coverage (%) | No. of Peptides | No. of Unique Peptides |
|-----------|-------------------|--------------------|---------------|-----------------------|-----------------|------------------------|
| COL1A1    | <i>Bos taurus</i> | P02453             | 2561          | 57                    | 53              | 1                      |
| COL1A2    | <i>Bos taurus</i> | P02465             | 2474          | 60                    | 51              | 10                     |
| COL3A1    | <i>Bos taurus</i> | P04258             | 1303          | 36                    | 31              | 8                      |

Table S17: Collagen chains identified in the Rabbit glue 6 sample (HM4).

| Gene Name | Taxonomy                     | Protein Identifier | Protein Score | Sequence Coverage (%) | No. of Peptides | No. of Unique Peptides |
|-----------|------------------------------|--------------------|---------------|-----------------------|-----------------|------------------------|
| COL1A2    | <i>Bos taurus</i>            | P02465             | 1463          | 46                    | 31              | 5                      |
| COL1A1    | <i>Bos taurus</i>            | P02453             | 1430          | 41                    | 34              | 0                      |
| COL1A2    | <i>Oryctolagus cuniculus</i> | G1T2Z5             | 569           | 23                    | 15              | 3                      |
| COL3A1    | <i>Bos taurus</i>            | P04258             | 485           | 16                    | 11              | 2                      |
| COL3A1    | <i>Oryctolagus cuniculus</i> | G1T8J0             | 251           | 8                     | 6               | 1                      |

Table S18: Collagen chains identified in the Rabbit glue 7 sample (HM5).

| Gene Name | Taxonomy                     | Protein Identifier | Protein Score | Sequence Coverage (%) | No. of Peptides | No. of Unique Peptides |
|-----------|------------------------------|--------------------|---------------|-----------------------|-----------------|------------------------|
| COL1A2    | <i>Sus scrofa</i>            | A0A1S7J1Y9         | 2617          | 61%                   | 53              | 15                     |
| COL1A1    | <i>Sus scrofa</i>            | A0A287A1S6         | 2524          | 54%                   | 52              | 7                      |
| COL3A1    | <i>Sus scrofa</i>            | F1RYI8             | 1949          | 43%                   | 46              | 22                     |
| COL1A1    | <i>Oryctolagus cuniculus</i> | G1T4A5             | 1757          | 48                    | 38              | 1                      |

Table S19: Collagen chains identified in the Strong Glue 8 sample (BM4).

| Gene Name | Taxonomy            | Protein Identifier | Protein Score | Sequence Coverage (%) | No. of Peptides | No. of Unique Peptides |
|-----------|---------------------|--------------------|---------------|-----------------------|-----------------|------------------------|
| COL1A1    | <i>Bos taurus</i>   | P02453             | 1845          | 65                    | 45              | 1                      |
| COL1A2    | <i>Bos taurus</i>   | P02465             | 2048          | 63                    | 48              | 9                      |
| COL1A1    | <i>Equus asinus</i> | B9VR88             | 1624          | 57                    | 40              | 4                      |
| COL1A2    | <i>Equus asinus</i> | B9VR89             | 1290          | 48                    | 31              | 7                      |
| COL1A2    | <i>Sus scrofa</i>   | A0A1S7J1Y9         | 1130          | 49                    | 26              | 5                      |

Table S20: Collagen chains identified in the Strong Glue 9 sample (BM5).

| Gene name | Taxonomy                                   | Protein Identifier    | Protein Score | Sequence Coverage % | No. of Peptides | No. of Unique Peptides |
|-----------|--------------------------------------------|-----------------------|---------------|---------------------|-----------------|------------------------|
| COL1A1    | <i>Bos taurus</i>                          | P02453                | 2337          | 53%                 | 50              | 0                      |
| COL1A2    | <i>Bos taurus</i>                          | P02465                | 2228          | 54%                 | 48              | 7                      |
| COL1A1    | <i>Sus scrofa</i>                          | A0A287A1S6            | 2242          | 50%                 | 49              | 4                      |
| COL1A2    | <i>Sus scrofa</i>                          | A0A1S7J1Y9            | 1860          | 48%                 | 43              | 11                     |
| COL1A1    | <i>Capra hircus</i><br>o <i>Ovis aries</i> | A0A452FHU9/<br>W5P481 | 2255          | 53%                 | 49              | 0                      |
| COL1A2    | <i>Ovis aries</i>                          | W5NTT7                | 1918          | 50%                 | 42              | 2                      |
| COL1A1    | <i>Equus asinus</i>                        | B9VR88                | 1930          | 44%                 | 42              | 1                      |
| COL1A2    | <i>Equus asinus</i>                        | B9VR89                | 1476          | 39%                 | 33              | 5                      |

Table S21: Collagen chains identified in the Rabbit Glue 10 sample (HP8).

| Gene Name | Taxonomy          | Protein Identifier | Protein Score | Sequence Coverage (%) | No. of Peptides | No. of Unique Peptides |
|-----------|-------------------|--------------------|---------------|-----------------------|-----------------|------------------------|
| COL1A1    | <i>Bos taurus</i> | P02453             | 2498          | 56                    | 52              | 1                      |
| COL1A2    | <i>Bos taurus</i> | P02465             | 2512          | 57                    | 51              | 9                      |
| COL3A1    | <i>Bos taurus</i> | P04258             | 1654          | 39                    | 38              | 9                      |

## Collagen modification: Backbone cleavage

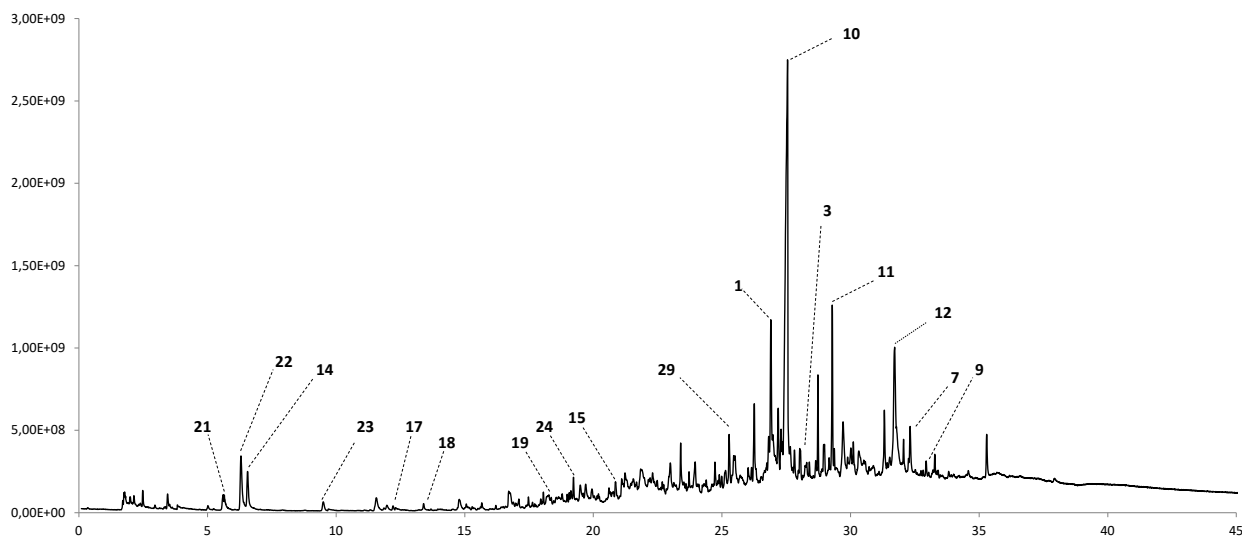

Figure S1. HP6 glue pyrogram. Peak numbering refers to compounds listed in Table S22

Table S22 Molecules identified in the pyrogram of HP6 and their most abundant mass spectrometric ions ( $m/z$ ).

| #                                                | Compound              | Characteristic (fragment) ions ( $m/z$ ) |
|--------------------------------------------------|-----------------------|------------------------------------------|
| <b>DKPs</b>                                      |                       |                                          |
| 1                                                | Cyclo(Pro-Ala)1       | 70, 97, 125, 168                         |
| 2                                                | Cyclo(Pro-Ala)2       | 70, 97, 125, 168                         |
| 3                                                | Cyclo(Pro-Val)1       | 70, 72, 125, 154, (196)                  |
| 4                                                | Cyclo(Pro-Val)2       | 70, 72, 125, 154, (196)                  |
| 5                                                | Cyclo(Pro-Met)1       | 70, 139, 154, 167, 228                   |
| 6                                                | Cyclo(Pro-Met)2       | 70, 139, 154, 167, 228                   |
| 7                                                | Cyclo(Pro-pyroGlu)    | 70, 96, 124, 152, 180, 208               |
| 8                                                | Cyclo(Pro-Phe)1       | 70, 91, 125, 153, 244                    |
| 9                                                | Cyclo(Pro-Phe)2       | 70, 91, 125, 153, 245                    |
| 10                                               | Cyclo(Pro-Gly)        | 83, 98, 111, 154                         |
| 11                                               | Cyclo(Pro-Pro)        | 70, 96, 138, 166, 194                    |
| 12                                               | Cyclo(Pro-Hyp)1       | 70, 86, 124, 210                         |
| 13                                               | Cyclo(Pro-Hyp)2       | 70, 86, 124, 210                         |
| <b>Aromatic hydrocarbons and heteroaromatics</b> |                       |                                          |
| 14                                               | Toluene               | 51, 65, 91                               |
| 15                                               | Benzenepropanenitrile | 91, 92, 131                              |

|                    |                      |                        |
|--------------------|----------------------|------------------------|
| 16                 | Phenol               | 55, 66, 94             |
| 17                 | Ethyl-benzene        | 51, 65, 77, 91, 106    |
| 18                 | Styrene              | 51, 71, 104            |
| 19                 | Methyl-phenol        | 51, 77, 107            |
| 20                 | Methyl-pyrrole       | 53, 81                 |
| 21                 | Pyridine             | 52, 79                 |
| 22                 | Pyrrole              | 52, 67                 |
| 23                 | Ethyl-pyrrole        | 53, 67, 80, 95         |
| 24                 | Benzeneacetonitrile  | 51, 63, 77, 90, 117    |
| 25                 | Diphenyl-ethylene    | 65, 91, 182            |
| 26                 | Propyl-benzene       | 65, 80, 91, 105, 120   |
| 27                 | Butenyl-benzene      | 65, 91, 104, 115, 132  |
| 28                 | Pyrazine             | 53, 8                  |
| 29                 | Diethyl-pyrazine     | 53, 80, 107, 108, 136  |
| 30                 | 2,5-Pyrrolidinedione | 56, 99                 |
| <b>Fatty acids</b> |                      |                        |
| 31                 | n-Hexadecanoic acid  | 60, 73, 129, 213, 256  |
| 32                 | 9-Octadecenoic acid  | 69, 83, 97, 111, 264   |
| 33                 | Tetradecanoic acid   | 73, 97, 129, 185, 228  |
| 34                 | Octadecanoic acid    | 73, 129, 185, 241, 284 |

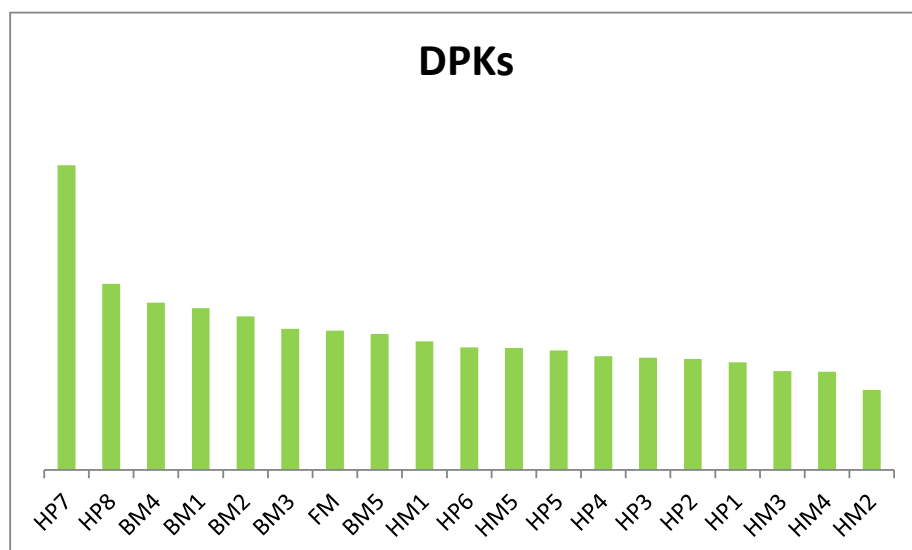

Figure S2. Sum of the areas of all DPKs detected normalized for the sample weight

## Collagen damage: deamidation of glutamine and asparagine.

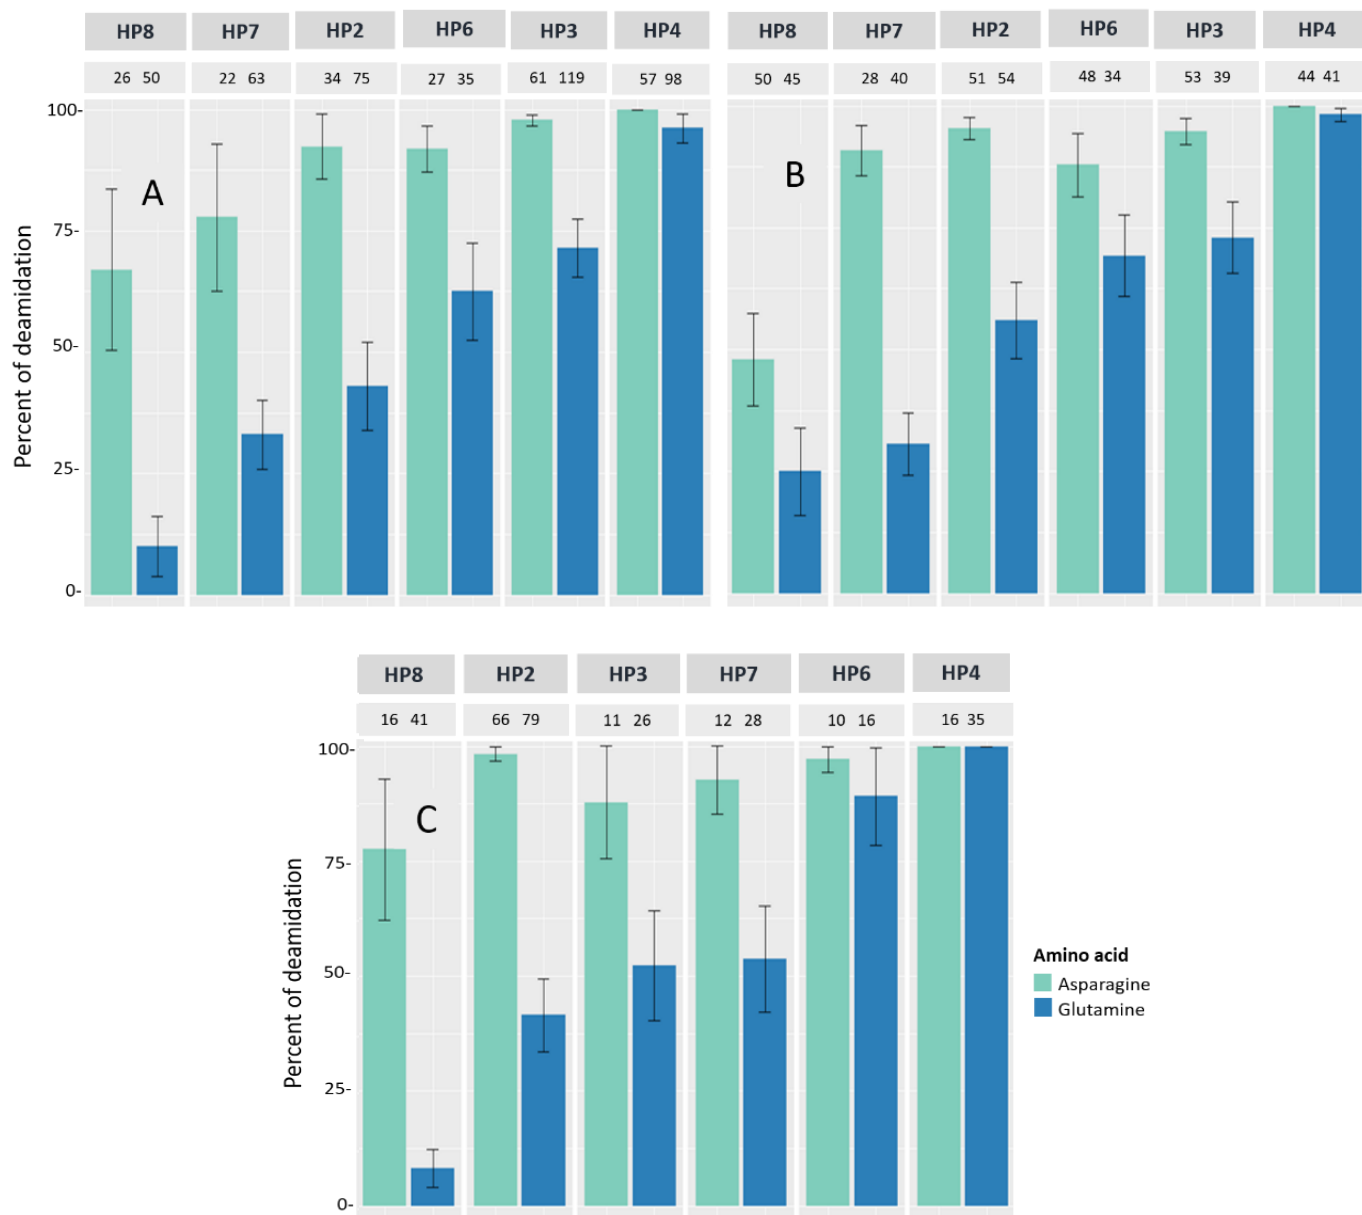

**Figure S3: Overall percentage of deamidation of the single collagen chains in bovine pure hide glues (HP).**

Semi-quantitative evaluation of deamidation for asparagines (N) and glutamines (Q) as calculated by MaxQuant software<sup>1</sup> with an in-house script based on peptide spectrum matches intensities<sup>2</sup>, for collagen alpha-1(I) (A), collagen alpha-2(I) (B), and collagen alpha-1(III) (C). Error bars represent standard deviation and numbers above each bar represent the number of peptides the data is based on.

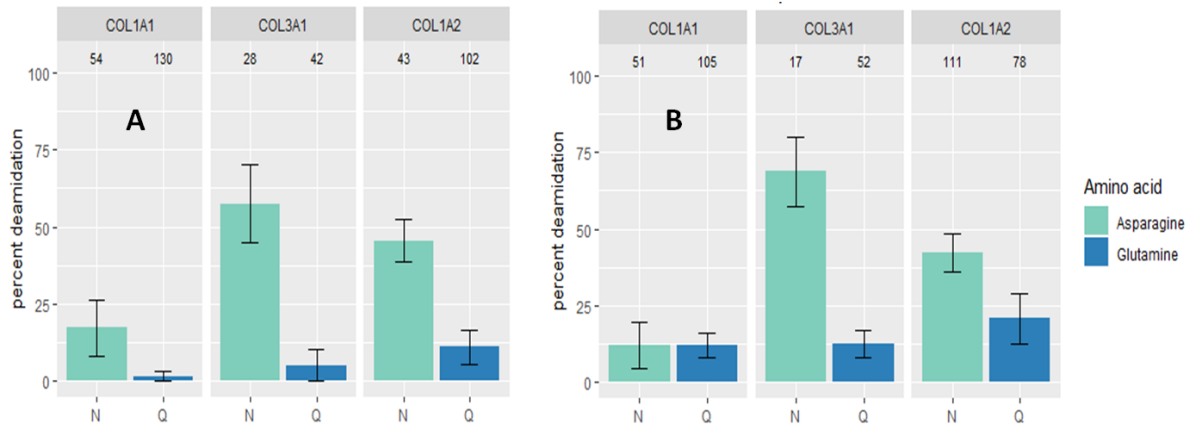

Figure S4: Overall percentage of deamidation of the single collagen chains in pure hide glues that contain only porcine glue (HP5) (A panel) and only rabbit glue (HP1) (B panel).

Semi-quantitative evaluation of deamidation for asparagines (N) and glutamines (Q) as calculated by MaxQuant software<sup>1</sup> with an in-house script based on peptide spectrum matches intensities<sup>2</sup> Error bars represent standard deviation and numbers above each bar represent the number of peptides the data is based on for the several chains of collagen

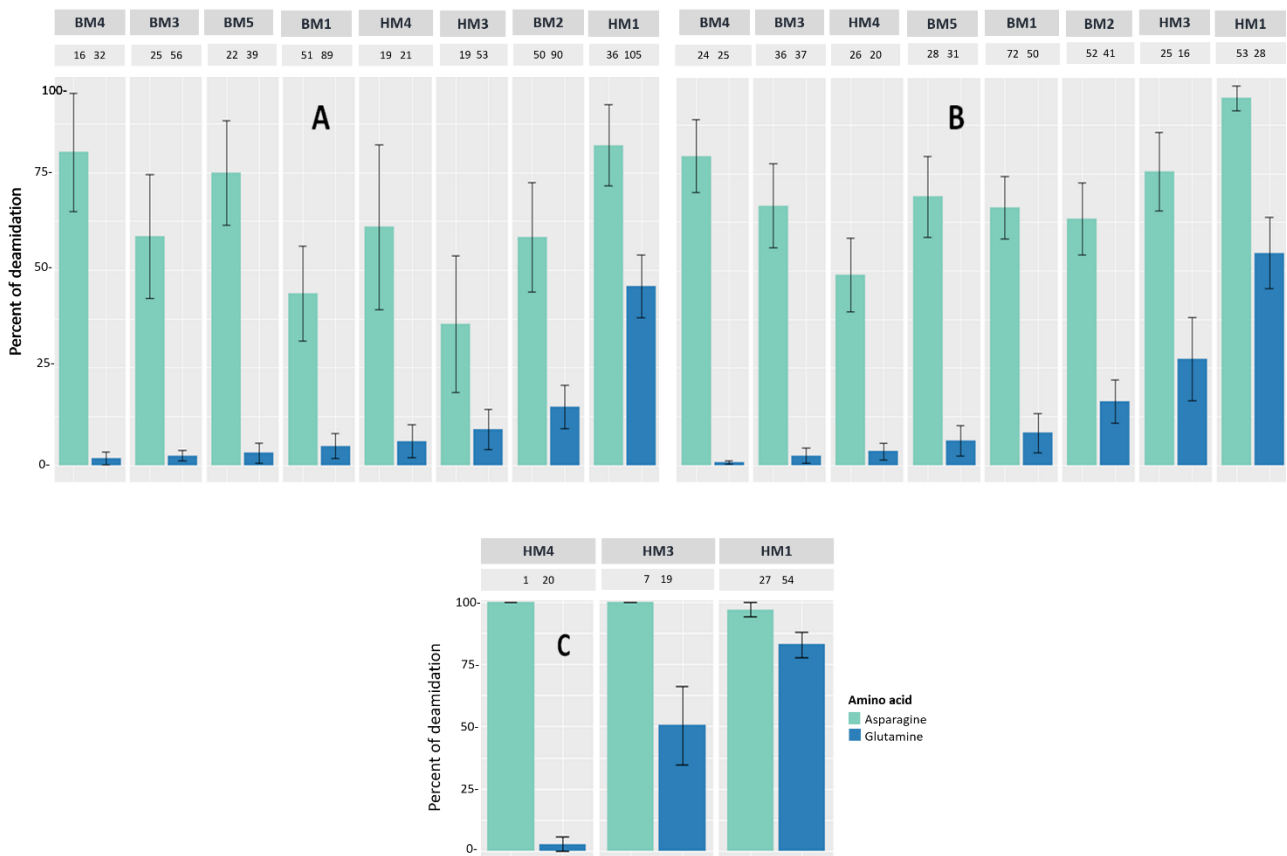

Figure S5: Overall percentage of deamidation of bovine collagen alpha-1(I) (A), collagen alpha-2(I) (B), and collagen alpha-1(III) (C) chains in mixed hide and bone glues containing bovine collagen.

Semi-quantitative evaluation of deamidation for asparagines (N) and glutamines (Q) as calculated by MaxQuant software<sup>1</sup> with an in-house script based on peptide spectrum matches intensities<sup>2</sup>. Error bars represent standard deviation and numbers above each bar represent the number of peptides the data is based on.

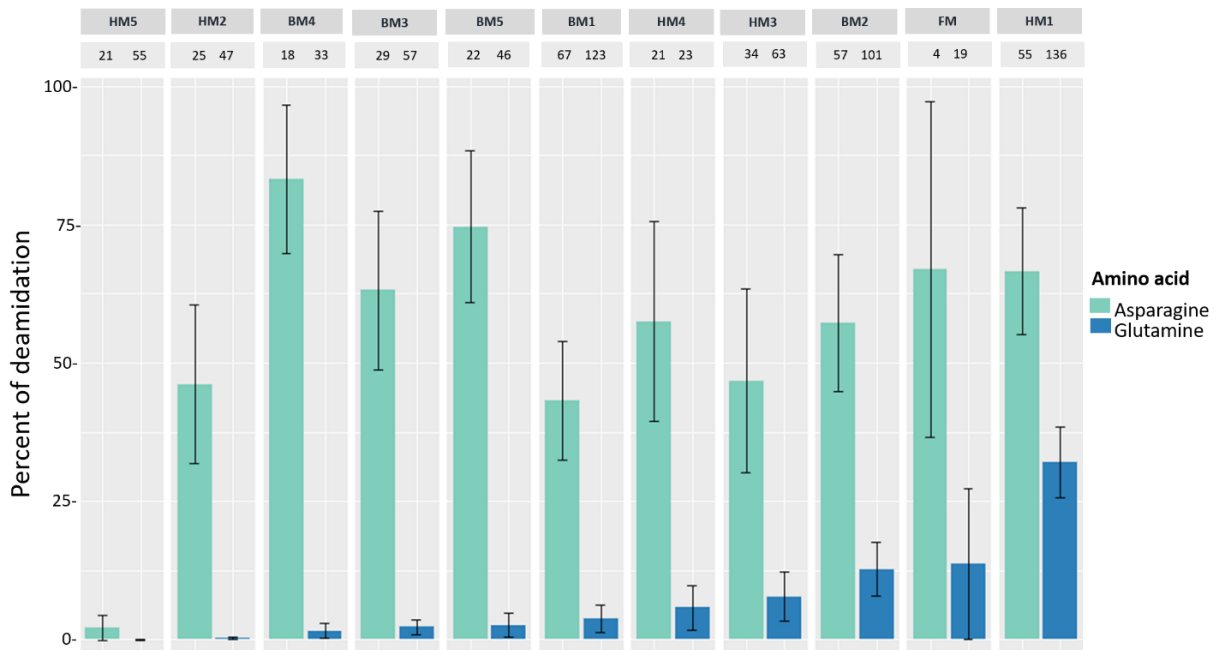

**Figure S6: Overall percentage of deamidation of the protein family collagen alpha-1(I) in mixed animal glues.** Semi-quantitative evaluation of deamidation for asparagines (N) and glutamines (Q) was as calculated by MaxQuant software<sup>1</sup> with an in-house script based on peptide spectrum matches intensities<sup>2</sup>. Error bars represent standard deviation and numbers above each bar represent the number of peptides the data is based on.

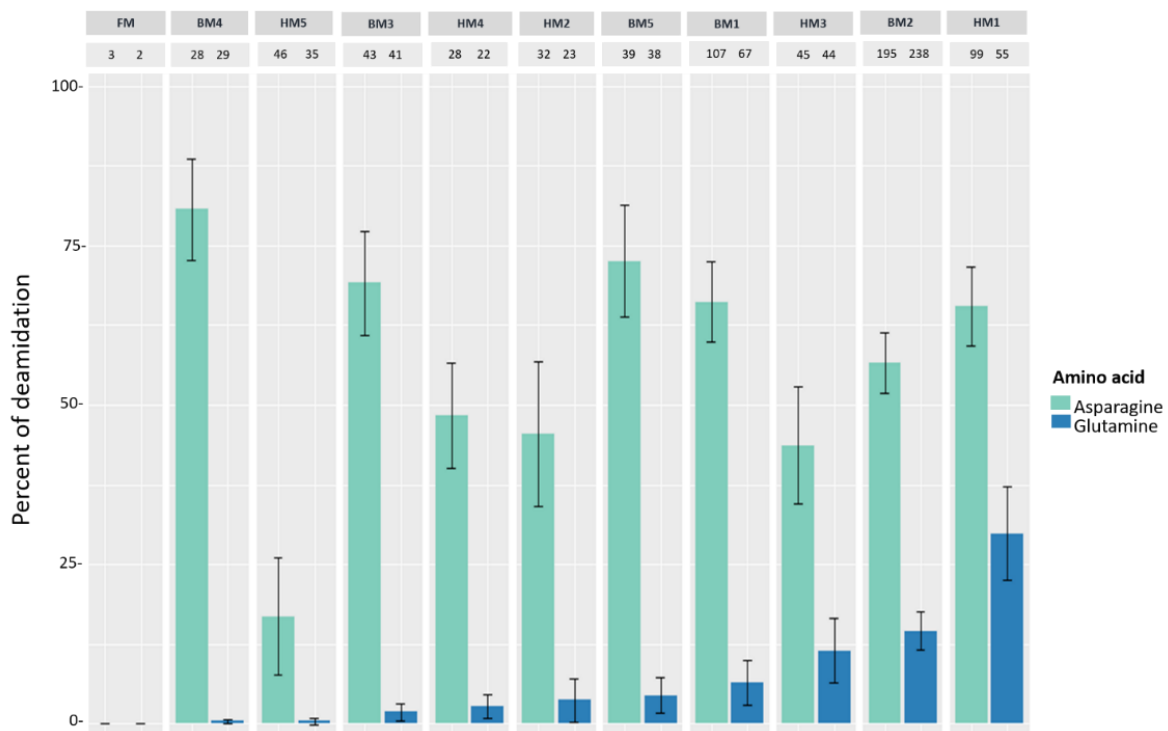

**Figure S7: Overall percentage of deamidation of the protein family collagen alpha-2(I) in mixed animal glues.** Semi-quantitative evaluation of deamidation for asparagines (N) and glutamines (Q) was as calculated by MaxQuant software<sup>1</sup> with an in-house script based on peptide spectrum matches intensities<sup>2</sup>. Error bars represent standard deviation and numbers above each bar represent the number of peptides the data is based on.



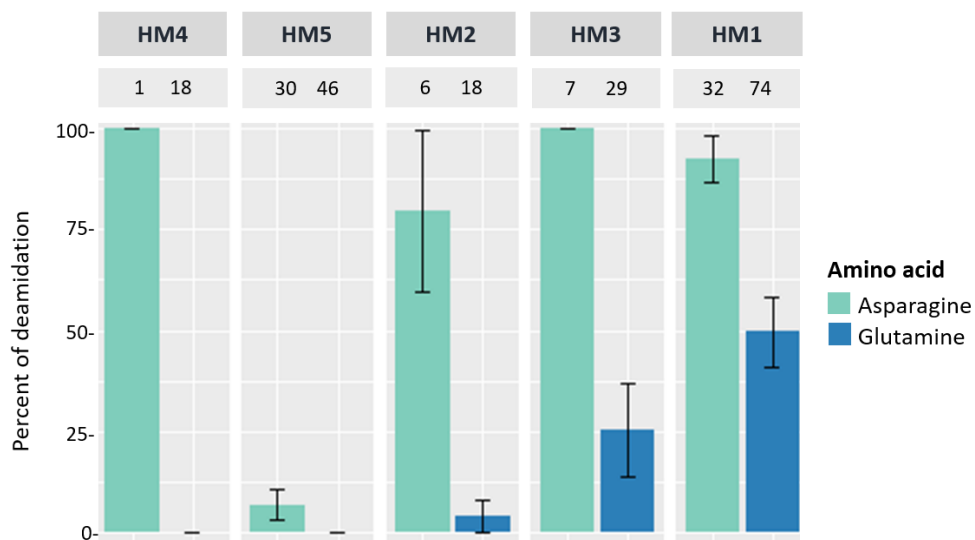

**Figure S8: Overall percentage of deamidation of the protein family collagen alpha-1(III) in mixed animal glues.** Semi-quantitative evaluation of deamidation for asparagines (N) and glutamines (Q) as calculated by MaxQuant software<sup>1</sup> with an in-house script based on peptide spectrum matches intensities<sup>2</sup>. Error bars represent standard deviation and numbers above each bar represent the number of peptides the data is based on.

Table S23: Site-specific evaluation of deamidation (N, Q) and oxidation (M) along *Bos taurus* collagen  $\alpha 1(I)$  sequence in all the pure bovine animal glues.

Asn and Gln detected as unmodified only (X); detected as deamidated (D); Detect both as unmodified and deamidated (DX); not detected at all (NF). Met detected as unmodified (X), as oxidized (O), both as unmodified and oxidized (OX); not detected at all (NF).

| AA Position | HP3 | HP4 | HP2 | HP6 | HP7 | HP8 |
|-------------|-----|-----|-----|-----|-----|-----|
| 162 Q       | NF  | NF  | NF  | NF  | NF  | NF  |
| 180 M       | NF  | NF  | NF  | NF  | NF  | NF  |
| 198 Q       | X   | X   | DX  | DX  | DX  | DX  |
| 201 Q       | D   | D   | DX  | DX  | DX  | DX  |
| 216 M       | NF  | NF  | NF  | NF  | NF  | NF  |
| 228 N       | D   | D   | D   | NF  | NF  | NF  |
| 249 Q       | NF  | NF  | NF  | NF  | NF  | NF  |
| 263 M       | NF  | NF  | NF  | NF  | NF  | NF  |
| 294 N       | DX  | D   | D   | DX  | DX  | NF  |
| 299 Q       | DX  | D   | DX  | DX  | DX  | D   |
| 300 M       | OX  | OX  | O   | O   | O   | O   |
| 323 N       | DX  | D   | DX  | DX  | DX  | DX  |
| 357 Q       | DX  | D   | DX  | DX  | D   | D   |
| 366 Q       | D   | D   | D   | DX  | DX  | D   |
| 386 N       | DX  | D   | DX  | DX  | DX  | DX  |
| 392 Q       | DX  | D   | DX  | DX  | DX  | DX  |
| 399 N       | DX  | D   | DX  | DX  | DX  | DX  |
| 420 Q       | DX  | D   | DX  | DX  | DX  | DX  |
| 431 N       | D   | D   | D   | NF  | NF  | NF  |
| 456 Q       | DX  | DX  | DX  | DX  | DX  | DX  |
| 560 Q       | DX  | D   | DX  | D   | DX  | DX  |
| 575 Q       | DX  | D   | DX  | D   | DX  | DX  |
| 579 M       | OX  | O   | O   | O   | OX  | O   |
| 618 Q       | DX  | D   | DX  | DX  | DX  | DX  |
| 633 Q       | NF  | NF  | NF  | NF  | DX  | NF  |
| 642 Q       | NF  | NF  | NF  | NF  | DX  | NF  |
| 660 Q       | NF  | NF  | NF  | NF  | DX  | NF  |
| 687 Q       | DX  | DX  | DX  | DX  | DX  | DX  |
| 699 N       | DX  | NF  | DX  | NF  | NF  | NF  |
| 704 N       | DX  | DX  | DX  | NF  | NF  | NF  |
| 720 Q       | DX  | D   | DX  | NF  | DX  | DX  |
| 726 Q       | DX  | X   | DX  | NF  | DX  | DX  |
| 728 M       | OX  | O   | O   | O   | O   | O   |
| 821 Q       | DX  | D   | DX  | DX  | DX  | DX  |
| 854 N       | DX  | D   | DX  | D   | DX  | DX  |
| 890 N       | DX  | D   | DX  | D   | DX  | DX  |
| 951 Q       | DX  | DX  | DX  | DX  | DX  | DX  |
| 956 Q       | DX  | D   | DX  | DX  | DX  | DX  |
| 965 Q       | DX  | D   | DX  | DX  | DX  | DX  |
| 984 Q       | NF  | NF  | NF  | NF  | NF  | NF  |
| 999 M       | OX  | OX  | OX  | O   | OX  | O   |

|        |    |    |    |    |    |    |
|--------|----|----|----|----|----|----|
| 1089 Q | NF | NF | NF | NF | NF | NF |
| 1101 Q | NF | NF | NF | NF | NF | NF |
| 1116 Q | DX | DX | DX | DX | DX | DX |
| 1128 Q | DX | DX | DX | DX | DX | DX |
| 1155 N | DX | DX | DX | DX | DX | DX |
| 1202 Q | NF | NF | NF | NF | NF | NF |
| 1205 Q | NF | NF | NF | NF | NF | NF |
| 1263 M | NF | NF | NF | NF | NF | NF |
| 1292 M | NF | NF | NF | NF | NF | NF |
| 1329 M | NF | NF | NF | NF | NF | NF |
| 1357 M | NF | NF | NF | NF | NF | NF |
| 1376 M | NF | NF | NF | NF | NF | NF |

**Table S24: Site-specific evaluation of deamidation (N, Q) and oxidation (M) along *Bos taurus* collagen  $\alpha 2(I)$  sequence in all the pure bovine animal glues.**

Asn and Gln detected as unmodified only (X); detected as deamidated (D); Detect both as unmodified and deamidated (DX); not detected at all (NF). Met detected as unmodified (X), as oxidized (O), both as unmodified and oxidized (OX); not detected at all (NF).

| <b>AA Position</b> | <b>HP3</b> | <b>HP4</b> | <b>HP2</b> | <b>HP6</b> | <b>HP7</b> | <b>HP8</b> |
|--------------------|------------|------------|------------|------------|------------|------------|
| 80 Q               | NF         | NF         | NF         | NF         | NF         | NF         |
| 91 M               | NF         | NF         | NF         | NF         | NF         | NF         |
| 94 M               | NF         | NF         | NF         | NF         | NF         | NF         |
| 109 Q              | NF         | NF         | NF         | DX         | DX         | DX         |
| 112 Q              | NF         | NF         | X          | DX         | DX         | DX         |
| 123 Q              | NF         | DX         | DX         | DX         | DX         | DX         |
| 160 Q              | NF         | DX         | NF         | D          | DX         | DX         |
| 181 N              | NF         | NF         | NF         | NF         | NF         | DX         |
| 189 Q              | D          | NF         | DX         | NF         | NF         | NF         |
| 205 N              | D          | DX         | DX         | NF         | NF         | NF         |
| 210 Q              | NF         | DX         | DX         | NF         | NF         | NF         |
| 270 N              | DX         | NF         | X          | D          | D          | NF         |
| 297 N              | DX         | DX         | DX         | DX         | DX         | DX         |
| 301 N              | D          | DX         | DX         | DX         | DX         | DX         |
| 357 N              | NF         | NF         | NF         | NF         | DX         | DX         |
| 366 Q              | NF         | NF         | DX         | NF         | DX         | DX         |
| 399 N              | NF         | NF         | NF         | NF         | NF         | NF         |
| 415 M              | NF         | NF         | NF         | O          | X          | O          |
| 433 N              | DX         | DX         | DX         | D          | DX         | DX         |
| 445 M              | OX         | OX         | OX         | O          | X          | OX         |
| 456 N              | D          | DX         | DX         | D          | DX         | DX         |
| 489 N              | D          | DX         | X          | DX         | DX         | DX         |
| 525 N              | NF         | NF         | DX         | DX         | DX         | DX         |
| 526 N              | NF         | NF         | DX         | DX         | DX         | DX         |
| 529 Q              | NF         | NF         | DX         | DX         | DX         | DX         |
| 535 Q              | NF         | DX         | X          | DX         | DX         | X          |

|        |    |    |    |    |    |    |
|--------|----|----|----|----|----|----|
| 538 Q  | NF | NF | DX | DX | DX | X  |
| 544 Q  | D  | NF | X  | DX | DX | DX |
| 553 Q  | NF | NF | DX | D  | DX | DX |
| 618 N  | D  | DX | DX | D  | DX | DX |
| 688 N  | D  | DX | DX | D  | DX | DX |
| 721 N  | D  | DX | DX | D  | D  | DX |
| 732 Q  | DX | DX | DX | D  | DX | DX |
| 748 N  | D  | DX | DX | D  | DX | DX |
| 766 N  | D  | DX | DX | DX | DX | DX |
| 823 Q  | NF | DX | NF | NF | NF | NF |
| 862 Q  | NF | DX | DX | DX | DX | DX |
| 909 N  | D  | DX | DX | DX | DX | DX |
| 912 N  | DX | DX | DX | DX | DX | DX |
| 916 N  | D  | DX | DX | DX | D  | DX |
| 927 N  | D  | NF | DX | DX | NF | NF |
| 930 N  | NF | NF | NF | NF | NF | NF |
| 939 Q  | NF | NF | NF | NF | NF | NF |
| 951 N  | DX | NF | NF | NF | NF | DX |
| 964 Q  | DX | DX | DX | DX | DX | DX |
| 975 N  | NF | DX | DX | D  | D  | NF |
| 1000 Q | NF | DX | NF | NF | DX | NF |
| 1024 N | D  | NF | DX | DX | DX | DX |
| 1027 Q | D  | DX | DX | DX | DX | DX |
| 1039 Q | DX | NF | DX | DX | DX | DX |
| 1068 Q | DX | DX | DX | DX | DX | DX |
| 1081 Q | NF | NF | NF | NF | NF | NF |
| 1084 Q | NF | NF | NF | NF | NF | NF |
| 1186 M | NF | NF | NF | NF | NF | NF |
| 1248 M | NF | NF | NF | NF | NF | NF |
| 1255 M | NF | NF | NF | NF | NF | NF |
| 1277 M | NF | NF | NF | NF | NF | NF |

Table S25. Accession entries as in the COLLE database and their correspondence in Uniprot database

| Entry as in "colle database" | Protein                                      | Gene   | Organism                      | Uniprot accession number |
|------------------------------|----------------------------------------------|--------|-------------------------------|--------------------------|
| AAI05185.1                   | Collagen type I alpha 1                      | COL1A1 | <i>Bos taurus</i>             | P02453                   |
| AAI49096.1                   | Collagen type I alpha 2                      | COL1A2 | <i>Bos taurus</i>             | P02465                   |
| AAI23470.1                   | Collagen type III alpha 1                    | COL3A1 | <i>Bos taurus</i>             | Q08E14                   |
| AOA287A1S6                   | Collagen type I alpha 1                      | COL1A1 | <i>Sus scrofa</i>             | AOA287A1S6               |
| NP_001230584.1               | Collagen type I alpha 2                      | COL1A2 | <i>Sus scrofa</i>             | A0A1S7J1Y9               |
| NP_001230226.1               | Collagen type III alpha 1                    | COL3A1 | <i>Sus scrofa</i>             | F1RYI8                   |
| G1T4A5                       | Collagen type I alpha 1                      | COL1A1 | <i>Oryctolagus cuniculus</i>  | G1T4A5                   |
| NP_001182597.1               | Collagen type I alpha 2                      | COL1A2 | <i>Oryctolagus cuniculus</i>  | G1T2Z5                   |
| G1T8J0                       | Collagen type III alpha 1                    | COL3A1 | <i>Oryctolagus cuniculus</i>  | G1T8J0                   |
| W5P481                       | Collagen type I alpha 1                      | COL1A1 | <i>Ovis aries</i>             | W5P481                   |
| XP_004007775.1               | Collagen type I alpha 2                      | COL1A2 | <i>Ovis aries</i>             | W5NTT7                   |
| W5Q4S0                       | Collagen type III alpha 1                    | COL3A1 | <i>Ovis aries</i>             | W5Q4S0                   |
| COL1A1-201                   | Collagen type I alpha 1                      | COL1A1 | <i>Capra hircus</i>           | A0A452FHU9               |
| XP_005678993.1               | Collagen type I alpha 2                      | COL1A2 | <i>Capra hircus</i>           | A0A452G3V6               |
| XP_005675926.1               | Collagen type III alpha 1                    | COL3A1 | <i>Capra hircus</i>           | N/A                      |
| AAH50014.1                   | Collagen type I alpha 1                      | COL1A1 | <i>Mus musculus</i>           | P11087                   |
| AAH42503.2                   | Collagen type I alpha 2                      | COL1A2 | <i>Mus musculus</i>           | Q01149                   |
| AAH52398.1                   | Collagen type III alpha 1                    | COL3A1 | <i>Mus musculus</i>           | Q7TT32                   |
| P02454                       | Collagen type I alpha 1                      | COL1A1 | <i>Rattus norvegicus</i>      | P02454                   |
| NP_445808.1                  | Collagen type I alpha 2                      | COL1A2 | <i>Rattus norvegicus</i>      | P02466                   |
| AAH87039.1                   | Collagen type III alpha 1                    | COL3A1 | <i>Rattus norvegicus</i>      | P13941                   |
| NP_001310708.1               | Collagen type I alpha 1                      | COL1A1 | <i>Equus asinus</i>           | B9VR88                   |
| NP_001310709.1               | Collagen type I alpha 2                      | COL1A2 | <i>Equus asinus</i>           | B9VR89                   |
| F7BJV7                       | Collagen type I alpha 1                      | COL1A1 | <i>Macaca mulatta</i>         | F7BJV7                   |
| NP_001253266.1               | Collagen type I alpha 2                      | COL1A2 | <i>Macaca mulatta</i>         | H9Z2D1                   |
| NP_001003090.1               | Collagen type I alpha 1                      | COL1A1 | <i>Canis lupus familiaris</i> | Q9XSJ7                   |
| NP_001003187.1               | Collagen type I alpha 2                      | COL1A2 | <i>Canis lupus familiaris</i> | O46392                   |
| M3W2F5                       | Collagen type I alpha 1                      | COL1A1 | <i>Felix catus</i>            | M3W2F5                   |
| AAH63249.1                   | Collagen type I alpha 1                      | COL1A1 | <i>Danio rerio</i>            | Q6P4U1                   |
| AAH71278.1                   | Collagen type I alpha 2                      | COL1A2 | <i>Danio rerio</i>            | Q6IQX2                   |
| P02457                       | Collagen type I alpha 1                      | COL1A1 | <i>Gallus gallus</i>          | P02457                   |
| NP_001073182.2               | Collagen type I alpha 2                      | COL1A2 | <i>Gallus gallus</i>          | A0A5H1ZRJ7               |
| P12105                       | Collagen type III alpha 1                    | COL3A1 | <i>Gallus gallus</i>          | P12105                   |
| NP_001116390.2               | Collagen type I alpha 1 precursor            | COL1A1 | <i>Oryzias latipes</i>        | A8QX86                   |
| H2M6N2                       | Collagen type I alpha 1b                     | COL1A1 | <i>Oryzias latipes</i>        | H2M6N2                   |
| NP_001080821.1               | Collagen type I alpha 1 S homeolog precursor | COL1A1 | <i>Xenopus laevis</i>         | Q802B5                   |
| NP_001080727.1               | Collagen type I alpha 2 L homeolog precursor | COL1A2 | <i>Xenopus laevis</i>         | Q801M5                   |
| SBS49270.1                   | Collagen type I alpha 2                      | COL1A2 | <i>Nothobranchius Furzeri</i> | A0A1A8UMG6               |
| NP_001117679.1               | Collagen type I alpha 2                      | COL1A2 | <i>Oncorhynchus mykiss</i>    | O93484                   |
| BAL40987.1                   | Collagen type I alpha 1                      | COL1A1 | <i>Oreochromis niloticus</i>  | G9M6I5                   |

|                |                                      |        |                                |                  |
|----------------|--------------------------------------|--------|--------------------------------|------------------|
| NP_001269826.1 | Collagen type I alpha 2              | COL1A2 | <i>Oreochromis niloticus</i>   | G9M616           |
| BAG72200.1     | collagen type I alpha 1              | COL1A1 | <i>Carassius auratus</i>       | B5U968           |
| BAG72201.1     | Collagen type I alpha 2              | COL1A2 | <i>Carassius auratus</i>       | B5U969           |
| ADK35755.1     | collagen type I alpha 1              | COL1A1 | <i>Ctenopharyngodon idella</i> | E2GK07           |
| ADK48763.1     | Collagen type I alpha 2              | COL1A2 | <i>Ctenopharyngodon idella</i> | E2IPR2           |
| ABY71227.1     | collagen type I alpha 1 partial      | COL1A1 | <i>Scyliorhinus canicula</i>   | D0PQF7           |
| ABY71228.1     | Collagen type I alpha 2 partial      | COL1A2 | <i>Scyliorhinus canicula</i>   | D0PQF8           |
| XP_013991798.1 | collagen type I alpha 1              | COL1A1 | <i>Salmo salar</i>             | A0A1S3LLE2       |
| XP_014072147.1 | Collagen type I alpha 2 isoform X1   | COL1A2 | <i>Salmo salar</i>             | A0A1S3T6D0       |
| XP_014072148.1 | Collagen type III alpha 1 Isoform X2 | COL3A1 | <i>Salmo salar</i>             | A0A1S3T6D7       |
| U3IW58         | Collagen type I alpha 2              | COL1A2 | <i>Anas platyrhynchos</i>      | U3IW58           |
| G1NB83         | Collagen type I alpha 2              | COL1A2 | <i>Meleagris gallopavo</i>     | G1NB83 (deleted) |
| W5N610         | collagen type I alpha 1b             | COL1A1 | <i>Lepisosteus oculatus</i>    | W5N610           |
| W5MY87         | Collagen type I alpha 2              | COL1A2 | <i>Lepisosteus oculatus</i>    | W5MY87           |
| W5MGF7         | Collagen type III alpha 1            | COL3A1 | <i>Lepisosteus oculatus</i>    | W5MGF7           |
| W5L8R7         | collagen type I alpha 1a             | COL1A1 | <i>Astyanax mexicanus</i>      | W5L8R7           |
| W5K5Z0         | collagen type I alpha 1b             | COL1A1 | <i>Astyanax mexicanus</i>      | W5K5Z0           |
| W5LPK3         | Collagen type I alpha 2              | COL1A2 | <i>Astyanax mexicanus</i>      | W5LPK3           |
| H2UF52         | collagen type I alpha 1a             | COL1A1 | <i>Takifugu rubripes</i>       | H2UF52 (deleted) |
| H2T1T7         | collagen type I alpha 1b             | COL1A1 | <i>Takifugu rubripes</i>       | H2T1T7 (deleted) |
| H2UR13         | Collagen type I alpha 2              | COL1A2 | <i>Takifugu rubripes</i>       | H2UR13 (deleted) |

## References

- (1) Cox, J.; Mann, M. MaxQuant Enables High Peptide Identification Rates, Individualized p.p.b.-Range Mass Accuracies and Proteome-Wide Protein Quantification. *Nat. Biotechnol.* **2008**, *26* (12), 1367–1372.
- (2) Mackie, M.; R  ther, P.; Samodova, D.; Di Gianvincenzo, F.; Granzotto, C.; Lyon, D.; Peggie, D. A.; Howard, H.; Harrison, L.; Jensen, L. J.; Olsen, J. V.; Cappellini, E. Palaeoproteomic Profiling of Conservation Layers on a 14th Century Italian Wall Painting. *Angew. Chemie - Int. Ed.* **2018**, *57* (25), 7369–7374.
